# Supplementary material for: Angiotensin II Blood Serum Levels in Piglets, after Intra-Dermal or Intra-Muscular Vaccination against PRRSV
Source: MDPI journal article supplement (doi:10.3390/vetsci9090496), 2022-09-11
Supplement: s1 [file s1]

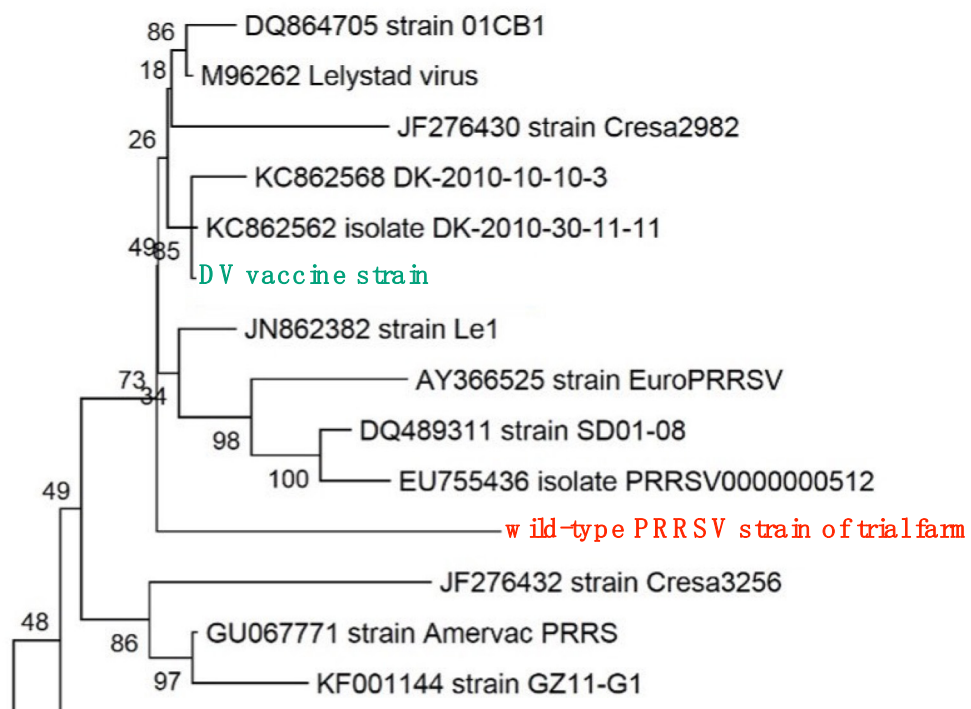

**Figure S1.** Comparison of ORF 5 sequences between the DV vaccine strain and the wild-type PRRSV strain of the trial farm: 90.7% sequence identity
